# Supplementary material for: Safety and Efficacy of Intratumoral Injections of Chimeric Antigen Receptor (CAR) T Cells in Metastatic Breast Cancer
Source: Oxford University Press journal article supplement (doi:10.1158/2326-6066.cir-17-0189), 2017-11-06
Supplement: 23266066cir170189-sup-181894_2_supp_4336471_xxz3jx.xlsx [file 23266066cir170189-sup-181894_2_supp_4336471_xxz3jx.xlsx]

## Sheet: Sheet1
	1.1.1 Safety and toxicity. Endpoints are based on the Common Terminology Criteria for Adverse Events (CTCAE) v4.0 grading from the time of the IT dose of RNA cMet CAR T cells to 28 days after the IT injection.
	select toxicities
Table S2. Comprehensive list of all adverse events based on CTCAE v4.0 grading from Day -2 (IT injection) to Day +25
Adverse Events		Grade 1	Grade 2	Grade 3
Local
	Erythema at injection site	3	0	0	subject 4, 5, 6
	pain	2	0	1	at skin graft donor site
	weight loss	1	0	0
Constitutional
	Blurred vision	1	0	0
	sore throat	1	0	0
	chills/flu-like symptoms/myalgia/fatigue	6	0	0
	Nail loss	1	0	0
	Arthralgia	1	2	0	001; 003 and 007 had grade 2; unrelated
	weight loss	1	0	0
	hot flashes	1	0	0
	hypotension	0	1	0
Gastrointestinal
	Nausea/vomiting	2	0	4	all 4 grade 3 events were related to radiation enteritis in 003
	constipation	1	0	0
Hematologic
	transaminases (ALT, AST) increases	3	0	0	all 4 grade 1 events occur in 006 deemed associated with her liver metastases and unrelated to treatment
	alkaline phosphatase increase	1	0	0
	Creatine increase	1	0	0
	hypercalcemia	1	0	0
	hypocalcemia	1	0	0
	hypomagnesemia	1	0	0
	anemia	0	0	1	after surgery
