# Supplementary material for: Safety and Efficacy of Intratumoral Injections of Chimeric Antigen Receptor (CAR) T Cells in Metastatic Breast Cancer
Source: Oxford University Press journal article supplement (doi:10.1158/2326-6066.cir-17-0189), 2017-11-06
Supplement: 23266066cir170189-sup-181894_2_supp_4336481_lxz3lz.xlsx [file 23266066cir170189-sup-181894_2_supp_4336481_lxz3lz.xlsx]

## Sheet: Sheet1
Table S1. Association of c-Met positive breast cancer with prognostic variables
		Overall	C-met+	C-met-	p-values
			H-score > 30	H-score < 30
n		59	27	32
Mean age of diagnosis +/- SD		62.8 + 13.3	63.3 + 12.4	62.3 + 14.1	0.78
Mean Tumor size (cm) [mean +/- SD]		2.2 + 1.3	2.3 + 1.3	2.0 + 1.3	0.352
No. of involved axilla node(s) [mean +/- SD]		1.8 + 4.2	1.4 + 3.2	2.3 + 5.2	0.395
Breast Cancer Subtypes [n (%)]
	ER+ or PR+/Her2-	19 (32.2)	9 (33.3)	10 (31.3)	0.88
	Any Her2+	8 (13.6)	3 (11.1)	5 (15.6)
	TNBC	32 (54.2)	15 (55.6)	17 (53.1)
Abbreviations used: ER - estrogen receptor; PR - progesterone receptor; Her2 - Her-2/neu receptor; SD - standard deviation; TNBC - triple negative breast cancer; H-score - as defined in method section
