# Supplementary material for: Safety and Efficacy of Intratumoral Injections of Chimeric Antigen Receptor (CAR) T Cells in Metastatic Breast Cancer
Source: Oxford University Press journal article supplement (doi:10.1158/2326-6066.cir-17-0189), 2017-11-06
Supplement: 23266066cir170189-sup-181894_2_supp_4336577_zxz58z.docx [file 23266066cir170189-sup-181894_2_supp_4336577_zxz58z.docx]

| **Table S3**. Serial quantification of serum IL6 from a patient with prolonged subjectove myalgia post IT injection of mRNA c-Met CAR T cells | |
| --- | --- |
| **Time points** | **IL6 (relative unit)** |
| 1 day pre-injection | 11.54 |
| IT injection day | 11.89 |
| 2 days after IT injection | 10.64 |
| 6 days after IT injection | 10.56 |
| 14 days after IT injection | 6.44 |
| 28 days after IT injection | 6.74 |
